# Supplementary material for: Homochiral assembly of polycatenated bilayers with mixing achiral ligands
Source: Royal Society of Chemistry journal article supplement (doi:10.1039/c2ce06297f), 2011-12-06
Supplement: c2ce06297f.pdf [file c2ce06297f.pdf]

Supporting materials

## Homochiral Assembly of Polycatenated Bilayers with Mixing Achiral Ligands

Juan Liu, Yan-Xi Tan, Fei Wang, Yao Kang and Jian Zhang\*

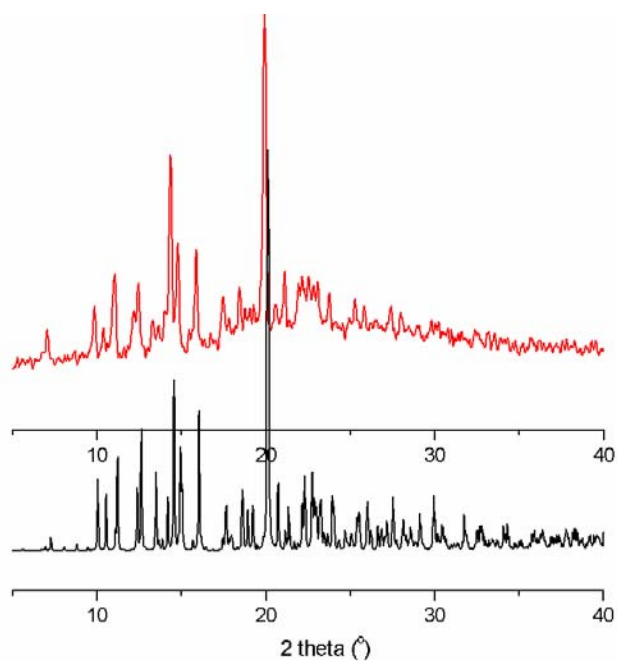

Fig. S1. Experimental (up) and simulated (bottom) powder X-ray diffraction patterns of compound 1

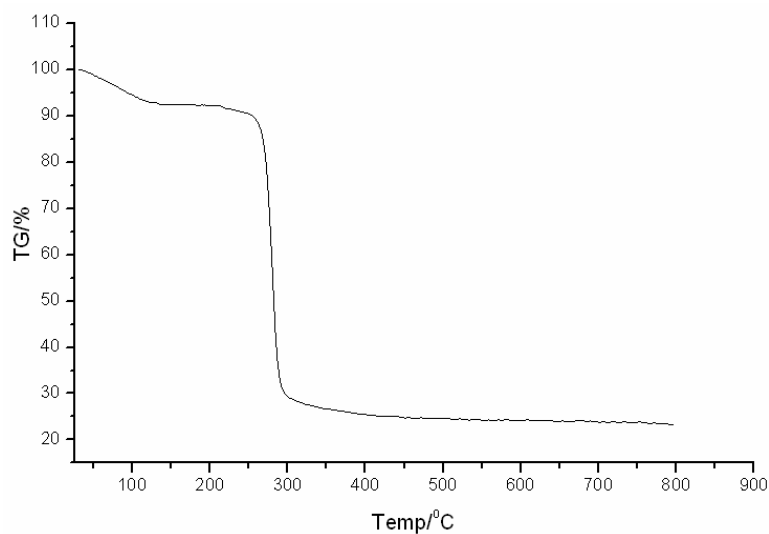

Fig. S2. TG plot of compound 1.
